# Supplementary material for: Enhancing Metabolomic Coverage in Positive Ionization Mode Using Dicationic Reagents by Infrared Matrix-Assisted Laser Desorption Electrospray Ionization
Source: MDPI journal article supplement (doi:10.3390/metabo11120810), 2021-11-29
Supplement: s1 [file s1]

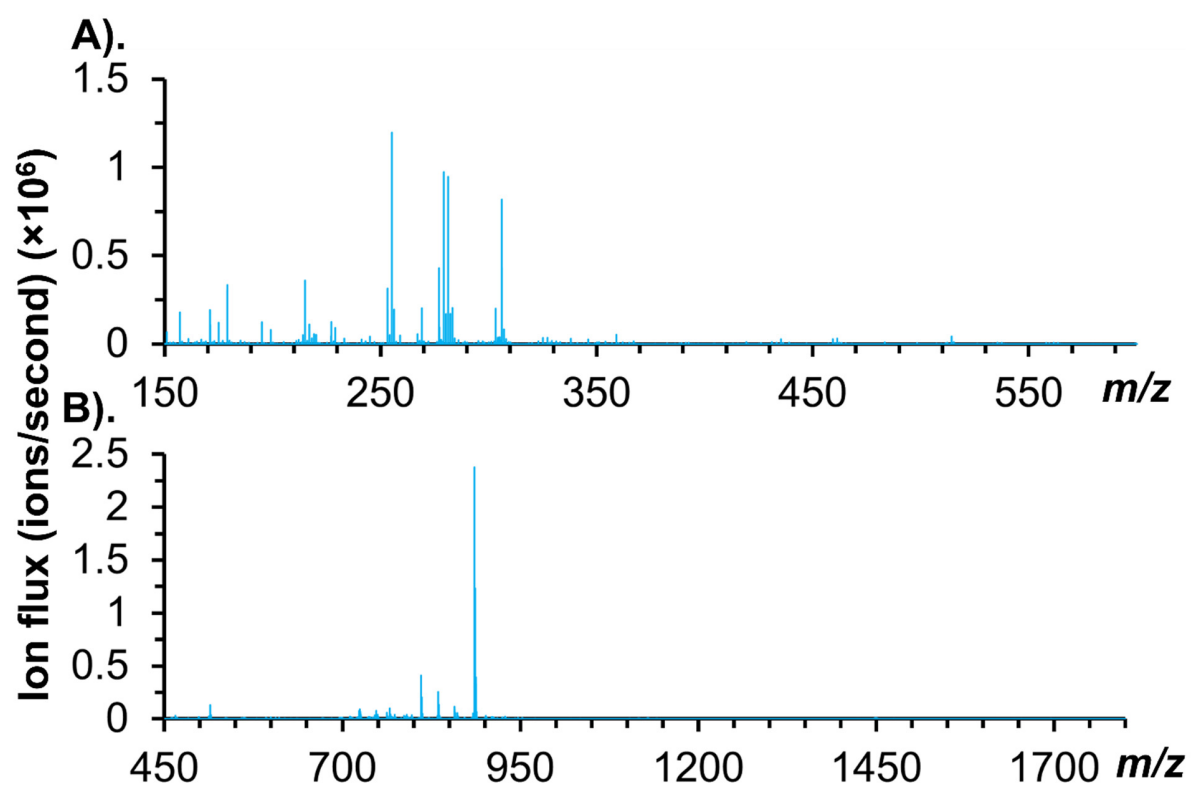

**Figure S1.** The representative mass spectrum was obtained in negative ionization mode from the rat liver section. **A).** at 150-600  $m/z$ ; **B).** at 450-1800  $m/z$ .
