# Supplementary material for: Enhancing Metabolomic Coverage in Positive Ionization Mode Using Dicationic Reagents by Infrared Matrix-Assisted Laser Desorption Electrospray Ionization
Source: Metabolites. 2021 Nov 29;11(12):810. doi: 10.3390/metabo11120810 (PMC8708802; doi:10.3390/metabo11120810)
Supplement: Supplementary file 1 [file metabolites-11-00810-s001.zip › Supplementary File_2_TableS1-4.xlsx]

## Sheet: Table S1
Table S1. 93 negatively charged metabolites from rat liver section detected and tentatively identified in negative ionization mode within ±2.5 ppm MMA
#	Putative ID	Adduct	Chemical Formula	Experimental m/z	Theoretical m/z	MMA (ppm)	Class		Common negatively charged metabolites detected in both adducted positive ionization mode and negative ionization mode were highlighted in blue.
1	Oxypurinol	M-H	C5H4N4O2	151.026	151.026	1.2986	Others		Other metabolites=Others
2	L-Histidine	M-H	C6H9N3O2	154.062	154.062	1.5029	Others		Glycerophosphocholines=PC
3	L-Phenylalanine	M-H	C9H11NO2	164.072	164.072	1.50544	Others		Fatty Acyls and Conjugates=FA
4	Uric acid	M-H	C5H4N4O3	167.021	167.021	0.657454	Others		Glycerophosphoserines=PS
5	Glycerol 2-phosphate	M-H	C3H9O6P	171.006	171.006	-1.18838	Others		Glycerophosphates=PA
6	L-Ascorbic acid/ FA (6:2);O4	M+Cl	C6H8O6	175.025	175.025	1.28038	FA		Glycerophosphoglycerols=PG
7	Gulonic acid	M-H	C6H12O7	195.051	195.051	0.364007	Others		Glycerophosphoinositols=PI
8	Glycerylphosphorylethanolamine	M-H	C5H14NO6P	214.048	214.049	-1.11744	Others		Glycerophosphoethanolamines=PE
9	Fuconic acid/ FA (6:0);O4	M-H	C6H12O6	215.033	215.033	0.820339	FA
10	D-Ribose 5-phosphate	M-H	C5H11O8P	229.012	229.012	-0.610696	Others
11	Uridine	M-H	C9H12N2O6	243.062	243.062	0.920581	Others
12	Gaidic acid/ FA (16:1)	M-H	C16H30O2	253.217	253.217	-0.972099	FA
13	Palmitic acid/ FA (16:0)	M-H	C16H32O2	255.233	255.233	-0.0656465	FA
14	Glucose 1-phosphate	M-H	C6H13O9P	259.022	259.022	-0.95115	Others
15	Inosine	M-H	C10H12N4O5	267.074	267.073	0.528486	Others
16	Heptadecenoic acid/ FA (17:1)	M-H	C17H32O2	267.233	267.233	-1.03565	FA
17	Linolenelaidic acid/ FA (18:3)	M-H	C18H30O2	277.217	277.217	-0.441327	FA
18	Linoleic acid/ FA (18:2)	M-H	C18H32O2	279.233	279.233	-0.822968	FA
19	Oleic Acid/ FA (18:1)	M-H	C18H34O2	281.248	281.249	-0.70173	FA
20	Stearic acid/ FA (18:0)	M-H	C18H36O2	283.264	283.264	-0.159311	FA
21	Sedoheptulose 1-phosphate	M-H	C7H15O10P	289.033	289.033	-0.146409	Others
22	Avenoleic acid/ FA (18:2); O	M-H	C18H32O3	295.228	295.228	1.12117	FA
23	Isoricinoleic Acid/ FA (18:1);O	M-H	C18H34O3	297.243	297.244	-0.0639207	FA
24	Eicosapentaenoic Acid/ FA (20:5)	M-H	C20H30O2	301.218	301.217	0.802747	FA
25	Eicosatetraenoic acid/FA (20:4)	M-H	C20H32O2	303.233	303.233	0.821054	FA
26	Eicosatrienoic acid/FA (20:3)	M-H	C20H34O2	305.248	305.249	-0.572382	FA
27	Glutathione	M-H	C10H17N3O6S	306.076	306.077	-0.895689	Others
28	Octadecadienyl acetate/ WE (20:2)	M-H	C20H36O2	307.264	307.264	-0.175744	FA
29	FA (20:1)	M-H	C20H38O2	309.28	309.28	-1.01331	FA
30	Uridine monophosphate (UMP)	M-H	C9H13N2O9P	323.029	323.029	0.358182	Others
31	Docosahexaenoic acid/ FA (22:6)	M-H	C22H32O2	327.233	327.233	0.698064	FA
32	Docosapentaenoic acid/ FA (22:5)	M-H	C22H34O2	329.248	329.249	-0.981221	FA
33	Docosatetraenoic Acid/ FA (22:4)	M-H	C22H36O2	331.264	331.264	0.658948	FA
34	Adenosine monophosphate	M-H	C10H14N5O7P	346.055	346.056	-1.1124	Others
35	CPA (18:0)	M-H	C21H41O6P	419.257	419.257	-0.240902	Other Glycerophospholipids
36	Deoxyguanosine diphosphate (dGDP)	M-H	C10H15N5O10P2	426.022	426.022	-0.100934	Others
37	Cholesterol sulfate/ ST (27:1);O;S	M-H	C27H46O4S	465.304	465.304	-0.0107457	Steroid conjugates
38	Taurodeoxycholic acid/ ST (24:1);O4;T	M-H	C26H45NO6S	498.289	498.289	0.0321098	Steroid conjugates
39	Sulfoglycolithocholate	M-H	C26H43NO7S	512.269	512.269	-0.486073	Steroid conjugates
40	Taurocholic acid	M-H	C26H45NO7S	514.285	514.284	0.502769	Steroid conjugates
41	FAHFA (34:2);O	M-H	C34H64O4	535.473	535.473	0.0298801	FA
42	FAHFA (34:1);O	M-H	C34H66O4	537.488	537.489	-1.17956	FA
43	Phosphoribosyl-AMP	M-H	C15H23N5O14P2	558.064	558.064	-0.00537572	Others
44	Mayolene-18/ FAHFA (36:4);O	M-H	C36H64O4	559.473	559.473	-0.383187	Fatty esters
45	FAHFA (36:2);O	M-H	C36H68O4	563.505	563.504	0.0283937	FA
46	Erythrinasinate A	M-H	C38H66O4	585.489	585.489	0.403082	Others
47	6-O-(1-O-stearoyl-sn-glycero-3-phosphono)-1D-myo-inositol	M-H	C27H53O12P	599.32	599.32	-0.867549	PE
48	UDP-GlcNAc	M-H	C17H27N3O17P2	606.074	606.074	-0.559885	Others
49	PA (34:2)	M-H	C37H69O8P	671.465	671.466	-0.9428	PA
50	PA (34:1)	M-H	C37H71O8P	673.481	673.481	-0.62511	PA
51	Dephospho-CoA	M-H	C21H35N7O13P2S	686.141	686.142	-0.185093	Fatty esters
52	PA (36:4)	M-H	C39H69O8P	695.465	695.466	-0.594697	PA
53	PA (36:3)	M-H	C39H71O8P	697.481	697.481	-0.88525	PA
54	PA (36:2)	M-H	C39H73O8P	699.497	699.497	-0.328534	PA
55	PE (34:2)	M-H	C39H74NO8P	714.508	714.508	-0.356286	PE
56	PA (38:6)	M-H	C41H69O8P	719.465	719.466	-0.50677	PA
57	PA (38:5)	M-H	C41H71O8P	721.481	721.481	-0.302052	PA
58	PA (38:4)	M-H	C41H73O8P	723.497	723.497	-0.0515488	PA
59	PA (38:3)	M-H	C41H75O8P	725.513	725.513	0.289185	PA
60	PA (39:4)	M-H	C42H75O8P	737.512	737.513	-0.620386	PA
61	PE (36:4)	M-H	C41H74NO8P	738.507	738.508	-0.85832	PE
62	PE (36:2)	M-H	C41H78O8P	742.539	742.539	0.074199	PE
63	PA (40:7)	M-H	C43H71O8P	745.481	745.481	0.050282	PA
64	PG (34:2)	M-H	C40H75O10P	745.502	745.503	-0.194086	PG
65	PA (40:6)	M-H	C43H73O8P	747.497	747.497	-0.524206	PA
66	PG (34:1)	M-H	C40H77O10P	747.517	747.518	-1.02004	PG
67	PA (40:5)	M-H	C43H75O8P	749.513	749.513	-0.0584408	PA
68	PE (38:6)	M-H	C43H74NO8P	762.508	762.508	-0.371396	PE
69	PE (38:5)	M-H	C43H76NO8P	764.523	764.524	-0.978996	PE
70	PE (38:4)	M-H	C43H78NO8P	766.539	766.539	0.0878833	PE
71	PG (36:4)	M-H	C42H75O10P	769.502	769.503	-0.724921	PG
72	PG (36:3)	M-H	C42H77O10P	771.518	771.518	-0.0790649	PG
73	PA (42:7)	M-H	C45H75O8P	773.512	773.513	-0.32807	PA
74	PG (36:2)	M-H	C42H79O10P	773.534	773.534	-0.355518	PG
75	PS (36:2)	M-H	C42H78NO10P	786.528	786.529	-0.760751	PS
76	PE (40:7)	M-H	C45H76NO8P	788.523	788.524	-0.32973	PE
77	PS (36:1)	M-H	C42H80NO10P	788.545	788.545	-0.0126816	PS
78	PE (40:6)	M-H	C45H78NO8P	790.539	790.539	0.0154407	PE
79	PE (40:5)	M-H	C45H80NO8P	792.555	792.555	0.214496	PE
80	PE (40:4)	M-H	C45H82NO8P	794.57	794.571	-0.092005	PE
81	PG (38:4)	M-H	C44H79O10P	797.534	797.534	-0.170203	PG
82	PS (38:4)	M-H	C44H78NO10P	810.529	810.529	-0.23539	PS
83	PI (34:2)	M-H	C43H79O13P	833.518	833.519	-0.904682	PI
84	PS (40:6)	M-H	C46H78NO10P	834.528	834.529	-0.756933	PS
85	PI (34:1)	M-H	C43H81O13P	835.532	835.534	-2.40086	PI
86	PS (40:5)	M-H	C46H80NO10P	836.545	836.545	0.836775	PS
87	PI (36:4)	M-H	C45H79O13P	857.518	857.519	-0.708589	PI
88	PS (42:8)	M-H	C48H78NO10P	858.529	858.529	-0.069887	PS
89	PI (36:2)	M-H	C45H83O13P	861.55	861.55	-0.0986736	PI
90	PI (38:5)	M-H	C47H81O13P	883.534	883.534	0.0822733	PI
91	PI (38:4)	M-H	C47H83O13P	885.549	885.55	-1.0712	PI
92	PI (40:6)	M-H	C49H83O13P	909.55	909.55	0.0153922	PI
93	PI (40:5)	M-H	C49H85O13P	911.566	911.566	-0.00658208	PI

## Sheet: Table S2
Table S2. 73 negatively charged metabolites from rat liver section forming adduct ions with the dicationic reagent detected in adducted positive ionization mode and putatively annotated within ±2.5 ppm MMA
#	Putative ID	Adduct	Chemical Formula	Experimental m/z	Theoretical m/z	Theoretical m/z without C5(bpyr)2	MMA (ppm)	Class		Common negatively charged metabolites detected in both adducted positive ionization mode and negative ionization mode were highlighted in blue.
1	4-Hydroxy-5-oxopentanoic acid	M-H+C5(bpyr)2	C5H8O4	455.385	455.384	131.035	0.940524	Others		Other metabolites=Others
2	L-Glutamine	M-H+C5(bpyr)2	C5H10N2O3	469.411	469.411	145.062	0.324449	Others		Glycerophosphocholines=PC
3	L-Glutamate	M-H+C5(bpyr)2	C5H9NO4	470.396	470.395	146.046	0.68772	Others		Fatty Acids and Conjugates=FA
4	Oxypurinol	M-H+C5(bpyr)2	C5H4N4O2	475.376	475.375	151.026	0.546936	Others		Glycerophosphoserines=PS
5	L-Histidine	M-H+C5(bpyr)2	C6H9N3O2	478.412	478.412	154.062	1.10574	Others		Glycerophosphates=PA
6	L-Phenylalanine	M-H+C5(bpyr)2	C9H11NO2	488.421	488.421	164.072	0.593341	Others		Glycerophosphoglycerols=PG
7	Glycerol 2-phosphate	M-H+C5(bpyr)2	C3H9O6P	495.356	495.356	171.006	0.969001	Others		Glycerophosphoinositols=PI
8	Ascorbic acid	M-H+C5(bpyr)2	C6H8O6	499.374	499.374	175.025	0.258323	Others
9	Gulonic acid	M-H+C5(bpyr)2	C6H12O7	519.4	519.4	195.051	-0.398922	Others
10	3-Indolebutyric acid	M-H+C5(bpyr)2	C12H13NO2	526.437	526.437	202.087	1.28999	Others
11	Glycerylphosphorylethanolamine	M-H+C5(bpyr)2	C5H14NO6P	538.398	538.398	214.049	0.910107	Others
12	2-Hydroxydecanedioic acid/ FA (10:1); O3	M-H+C5(bpyr)2	C10H18O5	541.458	541.457	217.108	0.606511	FA
13	2-Deoxysepiapterin	M-H+C5(bpyr)2	C9H11N5O2	544.434	544.433	220.084	1.57613	Others
14	D-Ribose 5-phosphate	M-H+C5(bpyr)2	C5H11O8P	553.362	553.361	229.012	0.721048	Others
15	Uridine	M-H+C5(bpyr)2	C9H12N2O6	567.412	567.412	243.062	0.507568	Others
16	Asperitaconic acid A/ FA (12:2);O3	M-H+C5(bpyr)2	C12H20O5	567.474	567.473	243.124	0.852551	FA
17	Gaidic acid/ FA (16:1)	M-H+C5(bpyr)2	C16H30O2	577.567	577.567	253.217	0.778438	FA
18	1-Methoxy-1-(2,4,5-trimethoxyphenyl)-2-propanol	M-H+C5(bpyr)2	C13H20O5	579.473	579.473	255.124	0.602616	Others
19	Palmitic acid/ FA (16:0)	M-H+C5(bpyr)2	C16H32O2	579.582	579.582	255.233	0.00897198	FA
20	Inosine	M-H+C5(bpyr)2	C10H12N4O5	591.422	591.423	267.073	-0.921507	Others
21	Heptadecenoic acid/ FA (17:1)	M-H+C5(bpyr)2	C17H32O2	591.583	591.582	267.233	0.466545	FA
22	FA (18:3)	M-H+C5(bpyr)2	C18H30O2	601.567	601.567	277.217	0.456309	FA
23	FA (18:2)	M-H+C5(bpyr)2	C18H32O2	603.583	603.582	279.233	0.784317	FA
24	FA (18:1)	M-H+C5(bpyr)2	C18H34O2	605.598	605.598	281.249	-0.466151	FA
25	neostearic acid/ FA (18:0)	M-H+C5(bpyr)2	C18H36O2	607.614	607.614	283.264	0.949288	FA
26	Avenoleic acid/ FA (18:2); O	M-H+C5(bpyr)2	C18H32O3	619.577	619.577	295.228	0.432392	FA
27	Ricinoleic acid/ FA (18:1); O	M-H+C5(bpyr)2	C18H34O3	621.593	621.593	297.244	0.633855	FA
28	3β,5β-Tetrahydronorethindrone	M-H+C5(bpyr)2	C20H30O2	625.567	625.567	301.217	0.0545106	Others
29	4Z,7Z,10Z,13Z-eicosatetraenoic acid/ FA (20:4)	M-H+C5(bpyr)2	C20H32O2	627.582	627.582	303.233	-0.2371	FA
30	Eicosatrienoic acid/ FA (20:3)	M-H+C5(bpyr)2	C20H34O2	629.598	629.598	305.249	0.198222	FA
31	Glutathione	M-H+C5(bpyr)2	C10H17N3O6S	630.426	630.426	306.077	0.719514	Others
32	11Z,15Z-eicosadienoic acid/ FA (20:2)	M-H+C5(bpyr)2	C20H36O2	631.614	631.614	307.264	0.876644	FA
33	Phytenic acid/ FA (20:1)	M-H+C5(bpyr)2	C20H38O2	633.63	633.629	309.28	0.43164	FA
34	Docosahexaenoic acid/ FA (22:6)	M-H+C5(bpyr)2	C22H32O2	651.582	651.582	327.233	-0.0816474	FA
35	11,12,13-trihydroxy-9-octadecenoic acid/ FA (18:1);O3	M-H+C5(bpyr)2	C18H34O5	653.583	653.583	329.233	-0.141834	FA
36	Clupanodonic acid/ FA (22:5)	M-H+C5(bpyr)2	C22H34O2	653.598	653.598	329.249	0.364138	FA
37	Adrenic Acid/ FA (22:4)	M-H+C5(bpyr)2	C22H36O2	655.614	655.614	331.264	0.0176933	FA
38	Adenosine monophosphate	M-H+C5(bpyr)2	C10H14N5O7P	670.405	670.405	346.056	-0.105906	Others
39	CPA (16:0)	M-H+C5(bpyr)2	C19H37O6P	715.575	715.575	391.226	0.490794	Other Glycerophospholipids
40	CPA (18:2)	M-H+C5(bpyr)2	C21H37O6P	739.575	739.575	415.226	0.0958659	Other Glycerophospholipids
41	CPA (18:1)	M-H+C5(bpyr)2	C21H39O6P	741.591	741.591	417.241	0.67517	Other Glycerophospholipids
42	CPA (18:0)	M-H+C5(bpyr)2	C21H41O6P	743.607	743.606	419.257	0.746363	Other Glycerophospholipids
43	cholesterol sulfate	M-H+C5(bpyr)2	C27H46O4S	789.654	789.654	465.304	0.0120306	Others
44	Taurodeoxycholic acid/ ST (24:1); O4; T	M-H+C5(bpyr)2	C26H45NO6S	822.639	822.639	498.289	0.542158	Steroid conjugates
45	Phe Lys Arg Arg	M-H+C5(bpyr)2	C30H55NO11	928.718	928.72	604.37	-1.87764	Others
46	PA (34:2)	M-H+C5(bpyr)2	C37H69O8P	995.815	995.815	671.466	0.4062	PA
47	PA (O-35:2); PA (P-35:1)	M-H+C5(bpyr)2	C38H73O7P	995.85	995.851	671.502	-1.49219	PA
48	PA (34:1)	M-H+C5(bpyr)2	C37H71O8P	997.832	997.831	673.481	1.00117	PA
49	PA (36:4)	M-H+C5(bpyr)2	C39H69O8P	1019.82	1019.82	695.466	0.00882513	PA
50	PA (36:3)	M-H+C5(bpyr)2	C39H71O8P	1021.83	1021.83	697.481	0.752571	PA
51	PA (36:2)	M-H+C5(bpyr)2	C39H73O8P	1023.85	1023.85	699.497	0.936664	PA
52	PE (34:2)	M-H+C5(bpyr)2	C39H74NO8P	1038.86	1038.86	714.508	0.250275	PE
53	PA (38:6)	M-H+C5(bpyr)2	C41H69O8P	1043.82	1043.82	719.466	0.277827	PA
54	PA (38:5)	M-H+C5(bpyr)2	C41H71O8P	1045.83	1045.83	721.481	0.692273	PA
55	PA (38:4)	M-H+C5(bpyr)2	C41H73O8P	1047.85	1047.85	723.497	1.56321	PA
56	PA (38:3)	M-H+C5(bpyr)2	C41H75O8P	1049.86	1049.86	725.513	1.34684	PA
57	PA (39:4)	M-H+C5(bpyr)2	C42H75O8P	1061.86	1061.86	737.513	-0.0282523	PA
58	PE (36:4)	M-H+C5(bpyr)2	C41H74NO8P	1062.86	1062.86	738.508	1.74059	PE
59	PE (36:2)	M-H+C5(bpyr)2	C41H78NO8P	1066.89	1066.89	742.539	0.033743	PE
60	PA (40:7)	M-H+C5(bpyr)2	C43H71O8P	1069.83	1069.83	745.481	-0.0149556	PA
61	PG (34:2)	M-H+C5(bpyr)2	C40H75O10P	1069.85	1069.85	745.503	-0.393512	PG
62	PA (40:6)	M-H+C5(bpyr)2	C43H73O8P	1071.85	1071.85	747.497	0.619492	PA
63	PA (40:5)	M-H+C5(bpyr)2	C43H75O8P	1073.86	1073.86	749.513	0.61181	PA
64	PE (38:6)	M-H+C5(bpyr)2	C43H74NO8P	1086.86	1086.86	762.508	-0.355152	PE
65	PE (38:5)	M-H+C5(bpyr)2	C43H76NO8P	1088.88	1088.87	764.524	2.24085	PE
66	PE (38:4)	M-H+C5(bpyr)2	C43H78NO8P	1090.89	1090.89	766.539	0.308922	PE
67	PG (36:4)	M-H+C5(bpyr)2	C42H75O10P	1093.85	1093.85	769.503	1.51666	PG
68	PA (42:7)	M-H+C5(bpyr)2	C45H75O8P	1097.86	1097.86	773.513	0.0746906	PA
69	PE (40:6)	M-H+C5(bpyr)2	C45H78NO8P	1114.89	1114.89	790.539	-0.0583018	PE
70	PE (40:5)	M-H+C5(bpyr)2	C45H80NO8P	1116.9	1116.9	792.555	-1.46834	PE
71	PE (40:4)	M-H+C5(bpyr)2	C45H82NO8P	1118.92	1118.92	794.571	0.420942	PE
72	PS (38:4)	M-H+C5(bpyr)2	C44H78NO10P	1134.88	1134.88	810.529	0.326026	PS
73	PI (38:4)	M-H+C5(bpyr)2	C47H83O13P	1209.9	1209.9	885.55	0	PI

## Sheet: Table S3
Table S3. 167 positively charged metabolites from rat liver section detected and putatively identified in positive ionization mode within ±2.5 ppm MMA
#	Putative ID	Adduct	Chemical Formula	Experimental m/z	Theoretical m/z	MMA (ppm)	Class		Common positively charged metabolites detected in both adducted positive ionization mode and positive ionization mode were highlighted in light red.
1	LysoPC(15:0)	M+H-H2O	C23H48NO7P	464.313	464.314	-0.392871	PC		Other metabolites=Others
2	LysoPC (17:0)	M+H-H2O	C25H52NO7P	492.345	492.345	-0.26066	PC		Glycerophosphocholines=PC
3	LysoPC (16:0)	M+H	C24H50NO7P	496.339	496.34	-0.946629	PC		Glycerophosphoethanolamines=PE
4	LysoPE (20:4)	M+H	C25H44NO7P	502.293	502.293	-0.186562	PE		Diradylglycerols=DG
5	LysoPE (22:4)	M+H-H2O	C27H48NO7P	512.313	512.314	-0.763637	PE		Glycerophosphates=PA
6	LysoPC (18:2)	M+H	C26H50NO7P	520.34	520.34	-0.324125	PC		Glycerophosphoglycerols=PG
7	LysoPC (18:1)	M+H	C26H52NO7P	522.355	522.355	-0.0131085	PC		Phosphosphingolipids=SM
8	LysoPC (18:0)	M+H	C26H54NO7P	524.371	524.371	-0.124039	PC		Triradylglycerols=TG
9	Raffinose	M+Na	C18H32O16	527.158	527.158	0.182517	Others
10	LysoPC (20:4)	M+H	C28H50NO7P	544.339	544.34	-1.23897	PC
11	Cer (d-36:1)	M+H-H2O	C36H71NO3	548.54	548.54	0.209647	Ceramindes
12	LysoPC (22:6)	M+H	C30H50NO7P	568.339	568.34	-0.616667	PC
13	Montecristin	M+H	C37H66O4	575.503	575.503	-1.12565	Others
14	Cohibin C/D	M+H	C37H68O4	577.518	577.519	-1.64664	Others
15	DG (32:1)	M+NH4	C35H66O5	584.524	584.525	-1.13745	DG
16	Anhydrorhodovibrin	M+Na	C41H58O	589.438	589.438	-0.337603	Others
17	PA (30:0)	M+H-H2O	C33H65O8P	603.439	603.438	0.484348	PA
18	PA (O-30:1)	M+H	C33H65O7P	605.454	605.454	-0.161392	PA
19	PA (O-30:0)	M+H	C33H67O7P	607.47	607.47	-0.131387	PA
20	DG (34:3)	M+NH4	C37H66O5	608.524	608.525	-0.638542	DG
21	DG (34:2)	M+NH4	C37H68O5	610.54	610.54	-0.994268	DG
22	DG (34:1)	M+NH4	C37H70O5	612.556	612.556	-0.822212	DG
23	PA (32:1)	M+H-H2O	C35H67O8P	629.454	629.454	0.0508377	PA
24	PA (32:0)	M+H-H2O	C35H69O8P	631.47	631.47	0.494085	PA
25	PA (O-32:1)	M+H	C35H69O7P	633.486	633.485	0.255728	PA
26	DG (36:4)	M+NH4	C39H68O5	634.54	634.54	-0.924588	DG
27	DG (36:3)	M+NH4	C39H70O5	636.556	636.556	-0.91217	DG
28	DG (36:2)	M+NH4	C39H72O5	638.571	638.572	-0.605953	DG
29	Cer (d-42:1)	M+H	C42H83NO3	650.645	650.645	0.0307387	Ceramindes
30	DG (37:2)	M+NH4	C40H74O5	652.587	652.587	0.0604025	DG
31	PA (34:3)	M+H-H2O	C37H67O8P	653.455	653.454	0.982472	PA
32	DG (37:1)	M+NH4	C40H76O5	654.603	654.603	-0.305529	DG
33	PA (34:2)	M+H-H2O	C37H69O8P	655.47	655.47	0.567532	PA
34	PA (34:1)	M+H-H2O	C37H71O8P	657.485	657.485	0.109508	PA
35	DG (38:6)	M+NH4	C41H68O5	658.54	658.54	-0.865084	DG
36	PA (34:0)	M+H-H2O	C37H73O8P	659.501	659.501	0.0030326	PA
37	DG (38:4)	M+NH4	C41H72O5	662.572	662.572	-0.0526174	DG
38	PA (O-36:4)	M+H-H2O	C39H71O7P	665.491	665.49	0.707126	PA
39	DG (39:3)	M+NH4	C42H76O5	678.603	678.603	0.248714	DG
40	PG (29:1)	M+H	C35H67O10P	679.455	679.454	0.686806	PG
41	PA (36:4)	M+H-H2O	C39H69O8P	679.47	679.47	0.208987	PA
42	DG (38:2)	M+NH4	C42H78O5	680.619	680.619	0.216902	DG
43	PA (36:1)	M+H-H2O	C39H75O8P	685.517	685.517	0.425956	PA
44	PC (O-32:0)	M+H-H2O	C40H84NO6P	688.601	688.6	0.536886	PC
45	DG (39:0)	M+Na	C42H82O5	689.604	689.605	-2.30261	DG
46	PA (38:6)	M+H-H2O	C41H69O8P	703.47	703.47	-0.153525	PA
47	SM (d-34:1)	M+H	C39H79N2O6P	703.574	703.575	-0.815539	SM
48	PE (34:3)	M+H	C39H72NO8P	714.506	714.507	-0.487396	PE
49	PE (34:2)	M+H	C39H74NO8P	716.522	716.522	-0.584358	PE
50	PE (34:1)	M+H	C39H76NO8P	718.538	718.538	-0.715834	PE
51	PA (36:3)	M+Na	C39H71O8P	721.478	721.478	0.156623	PA
52	PA (36:2)	M+Na	C39H73O8P	723.494	723.494	0.363514	PA
53	PE (P-36:4)/ PE (O-36:5)	M+H	C41H74NO7P	724.527	724.528	-0.219862	PE
54	PC (32:2)	M+H	C40H76NO8P	730.538	730.538	-0.361467	PC
55	PC (32:1)	M+H	C40H78NO8P	732.554	732.554	-0.311243	PC
56	PC (32:0)	M+H	C40H80NO8P	734.569	734.569	-0.644027	PC
57	PE (36:5)	M+H	C41H72NO8P	738.506	738.507	-1.30184	PE
58	PG (32:3)	M+Na	C38H69O10P	739.45	739.452	-2.44636	PG
59	PE (36:4)	M+H	C41H74NO8P	740.522	740.522	-0.746978	PE
60	PE (36:3)	M+H	C41H76NO8P	742.538	742.538	-0.536708	PE
61	PE (36:2)	M+H	C41H78NO8P	744.554	744.554	-0.130804	PE
62	PA (38:5)	M+Na	C41H71O8P	745.476	745.478	-2.08859	PA
63	PE (36:1)	M+H	C41H80NO8P	746.57	746.569	0.173816	PE
64	PA (38:4)	M+Na	C41H73O8P	747.492	747.494	-2.3639	PA
65	PA (38:3)	M+Na	C41H75O8P	749.508	749.509	-1.90391	PA
66	PA (38:2)	M+Na	C41H77O8P	751.526	751.525	1.87885	PA
67	PE (O-38:5)/PE (P-38:4)	M+H	C43H78NO7P	752.559	752.559	-0.150151	PE
68	PC (34:4)	M+H	C42H76NO8P	754.537	754.538	-1.03194	PC
69	PG (33:2)	M+Na	C39H73O10P	755.482	755.483	-2.26468	PG
70	PC (34:3)	M+H	C42H78NO8P	756.554	756.554	-0.188172	PC
71	PC (34:2)	M+H	C42H80NO8P	758.569	758.569	-0.536762	PC
72	PC (34:1)	M+H	C42H82NO8P	760.585	760.585	-0.463428	PC
73	PC (34:0)	M+H	C42H84NO8P	762.601	762.601	0.435231	PC
74	PG (34:5)	M+Na	C40H69O10P	763.451	763.452	-1.67085	PG
75	PE (38:6)	M+H	C43H74NO8P	764.522	764.522	-0.490693	PE
76	PE (38:5)	M+H	C43H76NO8P	766.538	766.538	-0.461751	PE
77	PC (O-36:5)/ PC (P-36:4)	M+H	C44H80NO7P	766.575	766.575	0.143683	PC
78	PG (34:3)	M+Na	C40H73O10P	767.482	767.483	-2.01403	PG
79	PE (38:4)	M+H	C43H78NO8P	768.554	768.554	0.0270059	PE
80	PA (40:7)	M+Na	C43H71O8P	769.478	769.478	-0.204034	PA
81	PE (P-38:6)	M+Na	C43H74NO7P	770.509	770.51	-0.0604226	PE
82	PE (38:3)	M+H	C43H80NO8P	770.569	770.569	-0.508934	PE
83	PA (40:6)	M+Na	C43H73O8P	771.494	771.494	0.107584	PA
84	PE (P-38:5)/ PE (O-38:6)	M+Na	C43H76NO7P	772.525	772.525	0.415605	PE
85	PC (38:2)	M+H	C43H82NO8P	772.585	772.585	-0.261491	PC
86	PA (40:5)	M+Na	C43H75O8P	773.509	773.509	-0.047834	PA
87	PG (34:0)	M+Na	C40H79O10P	773.528	773.53	-2.37957	PG
88	PE (38:1)	M+H	C43H84NO8P	774.6	774.601	-0.479664	PE
89	PC (36:6)	M+H	C44H76NO8P	778.537	778.538	-1.00935	PC
90	PG (35:4)	M+Na	C41H73O10P	779.482	779.483	-2.0161	PG
91	PC (36:5)	M+H	C44H78NO8P	780.552	780.554	-2.0839	PC
92	PC (36:4)	M+H	C44H80NO8P	782.569	782.569	-0.564684	PC
93	PG (35:2)	M+Na	C41H77O10P	783.513	783.515	-2.11995	PG
94	PC (36:3)	M+H	C44H82NO8P	784.584	784.585	-0.859512	PC
95	PC (36:2)	M+H	C44H84NO8P	786.601	786.601	0.234694	PC
96	SM (d-40:1)	M+H	C45H91N2O6P	787.669	787.669	-0.304499	SM
97	PC (36:1)	M+H	C44H86NO8P	788.616	788.616	-0.590071	PC
98	PG (36:5)	M+Na	C42H73O10P	791.483	791.483	-0.60973	PG
99	PE (40:6)	M+H	C45H78NO8P	792.554	792.554	-0.0668103	PE
100	PG (36:4)	M+Na	C42H75O10P	793.499	793.499	-0.437304	PG
101	PE (O-40:9)	M+Na	C45H74NO7P	794.509	794.51	-0.265573	PE
102	PE(40:5)	M+H	C45H80NO8P	794.569	794.569	-0.973859	PE
103	PG (36:3)	M+Na	C42H77O10P	795.513	795.515	-2.07541	PG
104	PA (41:1)	M+Na	C44H85O8P	795.586	795.587	-2.07017	PA
105	PE (P-40:7)	M+Na	C45H76NO7P	796.525	796.525	-0.486334	PE
106	PE (40:4)	M+H	C45H82NO8P	796.585	796.585	0.03515	PE
107	PA (42:7)	M+Na	C45H75O8P	797.51	797.512	-1.45233	PA
108	PG (36:2)	M+Na	C42H79O10P	797.529	797.53	-2.14321	PG
109	PE (P-40:6)	M+Na	C45H78NO7P	798.541	798.541	-0.0471143	PE
110	PG (36:1)	M+Na	C42H81O10P	799.544	799.546	-2.16109	PG
111	PE (40:2)	M+H	C45H86NO8P	800.616	800.616	-0.699282	PE
112	SM (d-41:1)	M+H	C46H93N2O6P	801.684	801.684	-0.609003	SM
113	PG (37:6)	M+Na	C43H73O10P	803.482	803.483	-2.28855	PG
114	PG (37:5)	M+Na	C43H75O10P	805.497	805.499	-2.16884	PG
115	PC (38:6)	M+H	C46H80NO8P	806.569	806.569	-0.140691	PC
116	PG (37:4)	M+Na	C43H77O10P	807.513	807.515	-1.86929	PG
117	PC (38:5)	M+H	C46H82NO8P	808.584	808.585	-0.813594	PC
118	PC (O-38:8)	M+Na	C46H78NO7P	810.541	810.541	0.109803	PC
119	PC (38:4)	M+H	C46H84NO8P	810.6	810.601	-0.787289	PC
120	PG (37:2)	M+Na	C43H81O10P	811.544	811.546	-2.31043	PG
121	PG (38:6)	M+NH4	C44H75O10P	812.544	812.544	0.616279	PG
122	SM (d-42:2)	M+H	C47H93N2O6P	813.684	813.684	-0.875504	SM
123	SM (d-42:1)	M+H	C47H95N2O6P	815.7	815.7	-0.371083	SM
124	PE (42:8)	M+H	C47H78NO8P	816.553	816.554	-0.587254	PE
125	PE (42:6)	M+H	C47H82NO8P	820.585	820.585	0.0337789	PE
126	PG (38:4)	M+Na	C44H79O10P	821.528	821.53	-2.33442	PG
127	PE (42:5)	M+H	C47H84NO8P	822.601	822.601	0.251094	PE
128	PG (38:3)	M+Na	C44H81O10P	823.544	823.546	-2.02532	PG
129	PE (42:4)	M+H	C47H86NO8P	824.616	824.616	-0.325284	PE
130	PG (38:2)	M+Na	C44H83O10P	825.56	825.562	-2.18881	PG
131	PE (P-42:6)	M+Na	C47H82NO7P	826.573	826.572	1.15222	PE
132	PG (38:1)	M+Na	C44H85O10P	827.575	827.577	-2.45643	PG
133	PG (39:7)	M+Na	C45H75O10P	829.497	829.499	-2.22102	PG
134	PC (40:8)	M+H	C48H80NO8P	830.568	830.569	-2.09296	PC
135	PG (39:6)	M+Na	C45H77O10P	831.513	831.515	-2.41717	PG
136	PG (39:5)	M+Na	C45H79O10P	833.529	833.53	-1.68703	PG
137	PC (40:6)	M+H	C48H84NO8P	834.6	834.601	-0.843895	PC
138	PG (39:4)	M+Na	C45H81O10P	835.545	835.546	-1.69196	PG
139	PC (40:5)	M+H	C48H86NO8P	836.617	836.616	0.223996	PC
140	PC (P-40:7)	M+Na	C48H82NO7P	838.572	838.572	-0.645336	PC
141	PG (40:6)	M+Na	C46H79O10P	845.528	845.53	-2.25539	PG
142	TG (50:3)	M+NH4	C53H96O6	846.754	846.755	-0.708103	TG
143	PG (40:5)	M+Na	C46H81O10P	847.544	847.546	-2.34184	PG
144	TG (50:2)	M+NH4	C53H98O6	848.77	848.77	-0.65473	TG
145	PG (40:4)	M+Na	C46H83O10P	849.56	849.562	-1.86126	PG
146	TG (50:1)	M+NH4	C53H100O6	850.786	850.786	0.134322	TG
147	PG (40:3)	M+Na	C46H85O10P	851.577	851.577	-0.76845	PG
148	PC (40:7)	M+Na	C48H82NO8P	854.567	854.567	-0.00397727	PC
149	PC (39:0)	M+Na	C47H94NO8P	854.659	854.661	-2.48371	PC
150	PG (41:6)	M+NH4	C47H81O10P	854.591	854.591	0.3556	PG
151	PG (42:8)	M+NH4	C48H79O10P	864.575	864.575	0.10582	PG
152	TG (52:5)	M+NH4	C55H96O6	870.754	870.755	-0.564015	TG
153	TG (52:4)	M+NH4	C55H98O6	872.771	872.77	0.496774	TG
154	PG (42:6)	M+Na	C48H83O10P	873.56	873.562	-1.81362	PG
155	TG (52:3)	M+NH4	C55H100O6	874.785	874.786	-0.480348	TG
156	PG (42:5)	M+Na	C48H85O10P	875.576	875.577	-1.57245	PG
157	TG (52:2)	M+NH4	C55H102O6	876.802	876.801	0.89061	TG
158	TG (53:3)	M+NH4	C56H102O6	888.801	888.801	-0.158787	TG
159	TG (53:2)	M+NH4	C56H104O6	890.817	890.817	0.289958	TG
160	TG (53:1)	M+NH4	C56H106O6	892.833	892.833	0.229266	TG
161	TG (54:5)	M+NH4	C57H100O6	898.786	898.786	-0.0197307	TG
162	TG (54:4)	M+NH4	C57H102O6	900.802	900.801	0.309128	TG
163	TG (54:3)	M+NH4	C57H104O6	902.817	902.817	0.0138367	TG
164	TG (55:4)	M+NH4	C58H104O6	914.817	914.817	-0.0595623	TG
165	TG (55:3)	M+NH4	C58H106O6	916.833	916.833	0.0100868	TG
166	TG (55:2)	M+NH4	C58H108O6	918.849	918.848	0.257016	TG
167	TG (57:4)	M+NH4	C60H108O6	942.848	942.848	0.0588158	TG

## Sheet: Table S4
Table S4. 18 negatively charged metabolites from hen ovary section forming adduct ions with the dicationic reagent detected in adducted positive ionization mode and putatively annotated
#	Putative ID	Adduct	Chemical Formula	Theoretical m/z	Theoretical m/z without C5(bpyr)2	Class		Common negatively charged metabolites detected in both adducted positive ionization mode and negative ionization mode were highlighted in blue.
1	4-(Methylnitrosamino)-1-(3-pyridyl)-1-butanone	M-H+C5(bpyr)2	C10H13N3O2	530.443	206.093	Others		Other metabolites=Others
2	2-Carboxy-5,7-dimethyl-4-octanolide,	M-H+C5(bpyr)2	C11H18O4	537.463	213.113	Others		Fatty Acids and Conjugates=FA
3	Macaridine, Acetyl vitamin K5	M-H+C5(bpyr)2	C13H13NO2	538.437	214.087	Others		Glycerophosphates=PA
4	Porphobilinogen	M-H+C5(bpyr)2	C10H14N2O4	549.437	225.088	Others
5	Pyroglutamylvaline	M-H+C5(bpyr)2	C10H16N2O4	551.453	227.104	Others
6	FA (18:2)	M-H+C5(bpyr)2	C18H32O2	603.582	279.233	FA
7	FA (20:4)	M-H+C5(bpyr)2	C20H32O2	627.582	303.233	FA
8	CPA (18:1)	M-H+C5(bpyr)2	C21H39O6P	741.59	417.241	PA
9	CPA(18:0)	M-H+C5(bpyr)2	C21H41O6P	743.606	419.257	PA
10	PA (34:1)	M-H+C5(bpyr)2	C37H71O8P	997.831	673.481	PA
11	Acidissiminin epoxide	M-H+C5(bpyr)2	C43H65NO5	998.828	674.479	Others
12	PA (36:3)	M-H+C5(bpyr)2	C39H71O8P	1021.83	697.481	PA
13	PA (36:2)	M-H+C5(bpyr)2	C39H73O8P	1023.85	699.497	PA
14	PA (38:5)	M-H+C5(bpyr)2	C41H71O8P	1045.83	721.481	PA
15	PA (38:4)	M-H+C5(bpyr)2	C41H73O8P	1047.85	723.497	PA
16	PA (38:3)	M-H+C5(bpyr)2	C41H75O8P	1049.86	725.513	PA
17	PA (38:2)	M-H+C5(bpyr)2	C41H77O8P	1051.88	727.528	PA
18	PA (40:5)	M-H+C5(bpyr)2	C43H75O8P	1073.86	749.513	PA
